# Supplementary material for: Association of Childhood Psychosocial Environment With 30‐Year Cardiovascular Disease Incidence and Mortality in Middle Age
Source: PubMed Central journal article supplement — J Am Heart Assoc. 2020 Apr 28;9(9):e015326. doi: 10.1161/JAHA.119.015326 (PMC7428574; doi:10.1161/jaha.119.015326), 2020-04-28
Supplement: JAH3-9-e015326-s001.pdf [file JAH3-9-e015326-s001.pdf]

# **SUPPLEMENTAL MATERIAL**

## Data S1.

### Supplemental Methods

Each question was dichotomized in order to capture responses that best reflected childhood adversity. Responses that were included in overall CFE adversity score are denoted with an “x” in the table below.

|   |                                                                                                                                                                                                                      | Rarely or none of the time | Some or little of the time | Occasionally or moderate amount of time | Most or all of the time |
|---|----------------------------------------------------------------------------------------------------------------------------------------------------------------------------------------------------------------------|----------------------------|----------------------------|-----------------------------------------|-------------------------|
| 1 | How often did a parent or other adult in the household make you feel that you were loved, supported, and cared for?<br><i>(similar to ACEs questionnaire item 4)</i>                                                 | x                          | x                          | x                                       |                         |
| 2 | How often did a parent or other adult in the household swear at you, insult you, put you down, or act in a way that made you feel threatened?<br><i>(similar to ACEs questionnaire item 1)</i>                       |                            | x                          | x                                       | x                       |
| 3 | How often did a parent or other adult in the household express physical affection for you such as hugging or other physical gesture of warmth and affection?<br><i>(not reflected by an ACEs questionnaire item)</i> | x                          | x                          |                                         |                         |
| 4 | How often did a parent or other adult in the household push, grab, shove, or hit you so hard you had marks or were injured?<br><i>(similar to ACEs questionnaire item 2)</i>                                         |                            | x                          | x                                       | x                       |
| 5 | Did you live with anyone who was a problem drinker or alcoholic, or who used street drugs?<br><i>(similar ACEs questionnaire item 8)</i>                                                                             |                            | x                          | x                                       | x                       |
| 6 | Would you say that the household you grew up in was well-organized and well-managed?<br><i>(not reflected by an ACEs questionnaire item)</i>                                                                         | x                          | x                          |                                         |                         |
| 7 | Did your family know what you were up to?<br><i>(not reflected by an ACEs questionnaire item)</i>                                                                                                                    | x                          | x                          |                                         |                         |

**Table S1. Characteristics of the study population versus excluded participants: CARDIA, 1985-86.**

|                                               | <b>Study Population</b><br>(n=3,646) | <b>Participants excluded for missing data</b><br>(n=21) | <b>P value</b> | <b>Participants not assessed at Y15 CARDIA examination</b><br>(n=1,440) | <b>P value</b> |
|-----------------------------------------------|--------------------------------------|---------------------------------------------------------|----------------|-------------------------------------------------------------------------|----------------|
| <b>Demographic characteristics</b>            |                                      |                                                         |                |                                                                         |                |
| Age, mean (SD)                                | 25.1 (3.6)                           | 25.9 (3.3)                                              | 0.27           | 24.3 (3.7)                                                              | <0.001         |
| Black race, No. (%)                           | 1,716 (47.1)                         | 11 (52.4)                                               | 0.63           | 904 (62.8)                                                              | <0.001         |
| Female sex, No. (%)                           | 2,036 (55.8)                         | 12 (57.1)                                               | 0.91           | 732 (50.8)                                                              | 0.001          |
| <b>Socioeconomic characteristics</b>          |                                      |                                                         |                |                                                                         |                |
| Recent unemployment, No. (%)                  | 1,011 (27.7)                         | 8 (38.1)                                                | 0.29           | 517 (36.0)                                                              | <0.001         |
| Participant education, No. (%)                |                                      |                                                         |                |                                                                         |                |
| ≤12 years                                     | 1,297 (35.6)                         | 7 (33.3)                                                | 0.83           | 724 (50.3)                                                              | <0.001         |
| 13-15 years                                   | 1,969 (54.0)                         | 11 (52.4)                                               | 0.88           | 607 (42.2)                                                              | <0.001         |
| ≥16 years                                     | 380 (10.4)                           | 3 (14.3)                                                | 0.56           | 109 (7.6)                                                               | <0.001         |
| Parental education, mean (SD), yr*            | 13.7 (3.1)                           | 14.8 (3.0)                                              | 0.28           | 13.4 (3.0)                                                              | <0.001         |
| <b>Clinical characteristics</b>               |                                      |                                                         |                |                                                                         |                |
| Current smoker, No. (%)                       | 990 (27.2)                           | 8 (38.1)                                                | 0.26           | 552 (38.8)                                                              | <0.001         |
| Body mass index, mean (SD), kg/m <sup>†</sup> | 24.9 (5.3)                           | 25.6 (5.6)                                              | 0.35           | 24.4 (5.2)                                                              | 0.24           |
| Waist circumference, mean (SD), cm            | 78.5 (12.0)                          | 80.0 (15.8)                                             | 0.37           | 77.4 (11.5)                                                             | 0.19           |
| Blood pressure, mean (SD), mm Hg              |                                      |                                                         |                |                                                                         |                |
| Systolic blood pressure                       | 110 (10.8)                           | 109 (11.5)                                              | 0.50           | 111 (11.2)                                                              | 0.43           |
| Diastolic blood pressure                      | 69 (9.7)                             | 68 (10.6)                                               | 0.64           | 68 (9.8)                                                                | 0.28           |
| <b>Serum biomarkers</b>                       |                                      |                                                         |                |                                                                         |                |
| Total cholesterol, mean (SD), mg/dL           | 177.5 (33.7)                         | 180.6 (28.4)                                            | 0.66           | 174.9 (34.8)                                                            | 0.01           |
| HDL cholesterol, mean (SD), mg/dL             | 53.0 (13.3)                          | 51.8 (12.8)                                             | 0.60           | 52.8 (13.7)                                                             | 0.26           |
| Triglycerides, median (SD), mg/dL             | 74.5 (52.6)                          | 70.3 (30.7)                                             | 0.82           | 73.6 (51.2)                                                             | 0.48           |
| Fasting glucose, mean (SD), mg/dL             | 82.6 (16.6)                          | 79.5 (9.22)                                             | 0.35           | 83.2 (20.7)                                                             | 0.11           |
| <b>Psychological Characteristics</b>          |                                      |                                                         |                |                                                                         |                |
| Depressive symptoms, No. (%) <sup>2</sup>     | 858 (23.5)                           | 5 (23.8)                                                | 0.84           | 251 (28.9)                                                              | <0.001         |

CFE, childhood family environment; dL, deciliter; HDL, high density lipoprotein; mg, milligrams; No, number; SD, standard deviation; Y15, year 15

\*Highest number of years achieved by any parental figure.

<sup>†</sup>Participants were classified as having depressive symptoms if CES-D score reached the validated cutoff of 16 or greater (range 0 to 60). CES-D was first measured during the year 5 exam (1990-91).

**Table S2. Number of observations imputed for each baseline covariate.**

| <b>Baseline characteristic</b> | <b>Number of Imputed Values</b> |
|--------------------------------|---------------------------------|
| Recent unemployment            | 8                               |
| Parental education             | 266                             |
| Current smoker                 | 19                              |
| Body mass index                | 12                              |
| Waist circumference            | 14                              |
| Total cholesterol              | 26                              |
| HDL cholesterol                | 26                              |
| Triglycerides                  | 27                              |
| Fasting glucose                | 125                             |
| Depressive symptoms            | 248                             |

HDL, high density lipoprotein

**Table S3. Frequencies of CVD events in included versus excluded patients: CARDIA, 1985-2018.**

| Outcome, No (%)                | Study population<br>(n=3,646) | Participants excluded for missing data<br>(n=21) | Participants not assessed at Y15 CARDIA examination<br>(n=1,440) |
|--------------------------------|-------------------------------|--------------------------------------------------|------------------------------------------------------------------|
| All-Cause Mortality            | 201 (5.5)                     | 3 (14.3)                                         | 234 (16.3)                                                       |
| All CVD events <sup>1</sup>    | 198 (5.4)                     | 1 (4.8)                                          | 81 (5.6)                                                         |
| Coronary artery disease        | 93(2.6)                       | 1 (4.8)                                          | 40 (2.8)                                                         |
| Myocardial infarction          | 80 (2.2)                      | 1 (4.8)                                          | 35 (2.4)                                                         |
| Non-MI acute coronary syndrome | 13 (0.4)                      | 0 (0.0)                                          | 5 (0.4)                                                          |
| Stroke                         | 72 (2.0)                      | 0 (0.0)                                          | 19 (1.3)                                                         |
| Heart failure                  | 60 (1.7)                      | 0 (0.0)                                          | 27 (1.9)                                                         |
| Carotid artery disease         | 1 (0.03)                      | 0 (0.0)                                          | 0 (0.0)                                                          |
| Peripheral artery disease      | 7 (0.2)                       | 0 (0.0)                                          | 5 (0.4)                                                          |

CVD, cardiovascular disease; MI, myocardial infarction; No, number; Y15, year 15
